# Supplementary material for: Gene Therapy-Mediated Partial Reprogramming Extends Lifespan and Reverses Age-Related Changes in Aged Mice
Source: PubMed Central journal article supplement (PMC10909732; doi:10.1089/cell.2023.0072), 2024-02-15
Supplement: Supp_TableS1.pdf [file Supp_TableS1.pdf]

## Supplemental Table 1

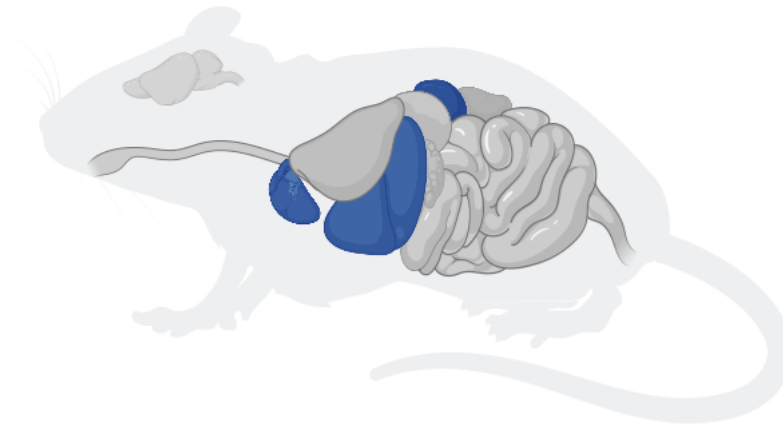

Tissues colored blue exhibit high-confidence expression of OSK.

| Tissues expressing GOI by AAV9 with relevant design | Promoter used                                                                                  | Paper                                                                   |
|-----------------------------------------------------|------------------------------------------------------------------------------------------------|-------------------------------------------------------------------------|
| Liver                                               | EF1a                                                                                           | Chandler et al, Hum Mol Genet, 2017<br>Inagaki et al, Mol Therapy, 2006 |
|                                                     | UBC-rtTA4; TRE-OSK                                                                             | Lu et al, Nature, 2020                                                  |
|                                                     | EF1a-rtTA4; TRE-OSK                                                                            | This paper                                                              |
| Heart                                               | EF1a                                                                                           | Inagaki et al, 2006                                                     |
|                                                     | EF1a-rtTA4; TRE-OSK                                                                            | This paper                                                              |
| Spleen                                              | CMV-OSK                                                                                        | This paper                                                              |
| Pancreas                                            | UBC-rtTA4; TRE-OSK                                                                             | Lu et al, Nature, 2020                                                  |
| Brain*                                              | EF1a                                                                                           | Inagaki et al, 2006<br>Chandler et al, 2017, Hum Mol Genet              |
|                                                     | EF1a-rtTA4; TRE-OSK<br>(*not expressed due to the low co-transduction efficiency to the brain) | This paper                                                              |
